# Supplementary material for: Phosphinoamido ligand supported heterobimetallic rare-earth metal–palladium complexes: versatile structures and redox reactivities
Source: Royal Society of Chemistry journal article supplement (doi:10.1039/d2dt01084d), 2022-01-01
Supplement: d2dt01084d1.pdf [file d2dt01084d1.pdf]

## Supporting Information:

### Phosphinoamido Ligand Supported Heterobimetallic Rare-Earth Metal-Palladium Complexes: Versatile Structures and Redox Reactivities

Jun Du†, Xiuyan He†, Dongjing Hong†, Shuangliu Zhou†, Huayi Fang\*‡ and Peng Cui\*†

† Key Laboratory of Functional Molecular Solids, Ministry of Education; Anhui Laboratory of Molecule-Based Materials; College of Chemistry and Materials Science  
Anhui Normal University  
S 189, Jiuhua Road, Wuhu, Anhui 241002 (P. R. China)  
E-mail: pcui@ahnu.edu.cn

‡ School of Materials Science and Engineering, *Tianjin Key Lab for Rare Earth Materials and Applications*  
Nankai University  
No. 38 Tongyan Road, Haihe Education Park, Tianjin 300350 (P. R. China)  
E-mail: hfang@nankai.edu.cn

## Table of Contents:

|                                |    |
|--------------------------------|----|
| 1. NMR Spectroscopic Data..... | 2  |
| 2. X-ray Crystallography.....  | 8  |
| 3. Computational Results ..... | 12 |

# 1. NMR Spectroscopic Data

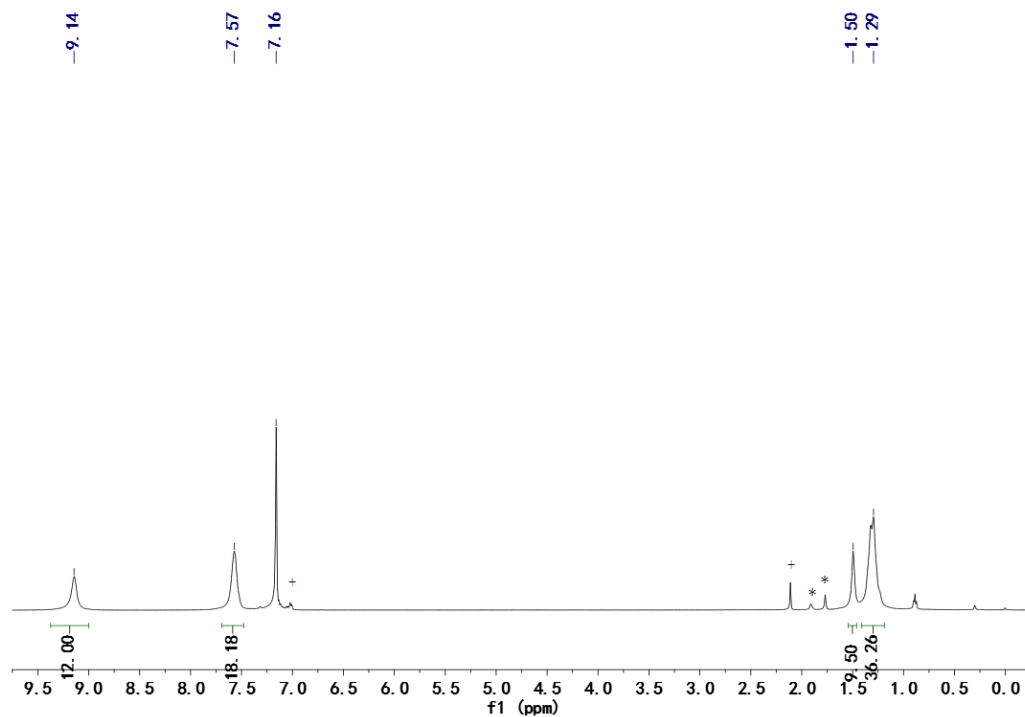

Figure S1.  $^1\text{H}$  NMR spectrum of **4** in  $\text{C}_6\text{D}_6$  at 25 °C. (\* denotes small amount of free ligand and small amount of toluene)

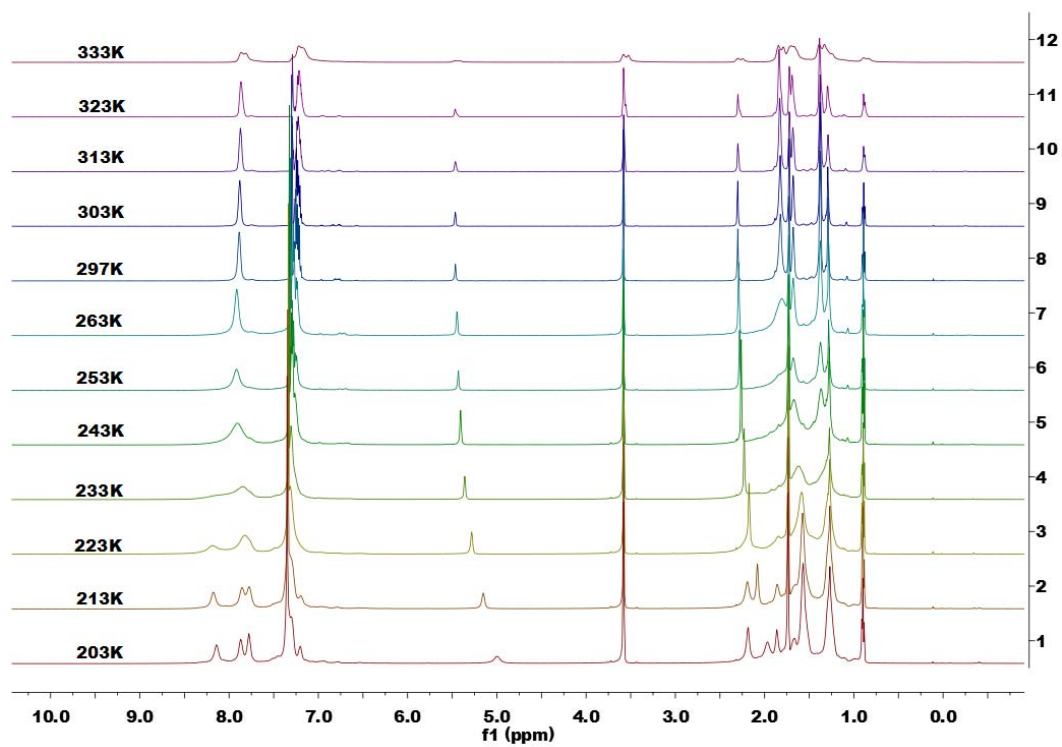

Figure S2. VT- $^1\text{H}$  NMR spectra of **7** in  $\text{THF-}d_8$  at various temperature.

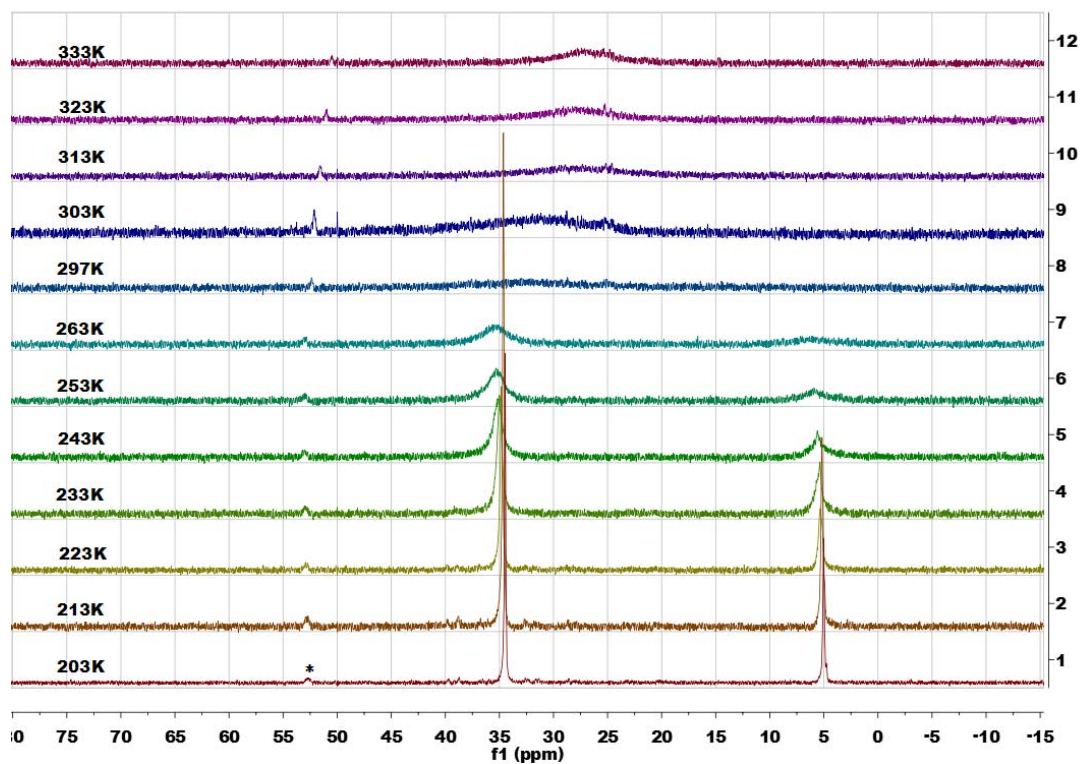

Figure S3. VT- $^{31}\text{P}\{^1\text{H}\}$  NMR spectra of **7** in  $\text{THF-}d_8$  at various temperature. (\* denotes small amount of impurities)

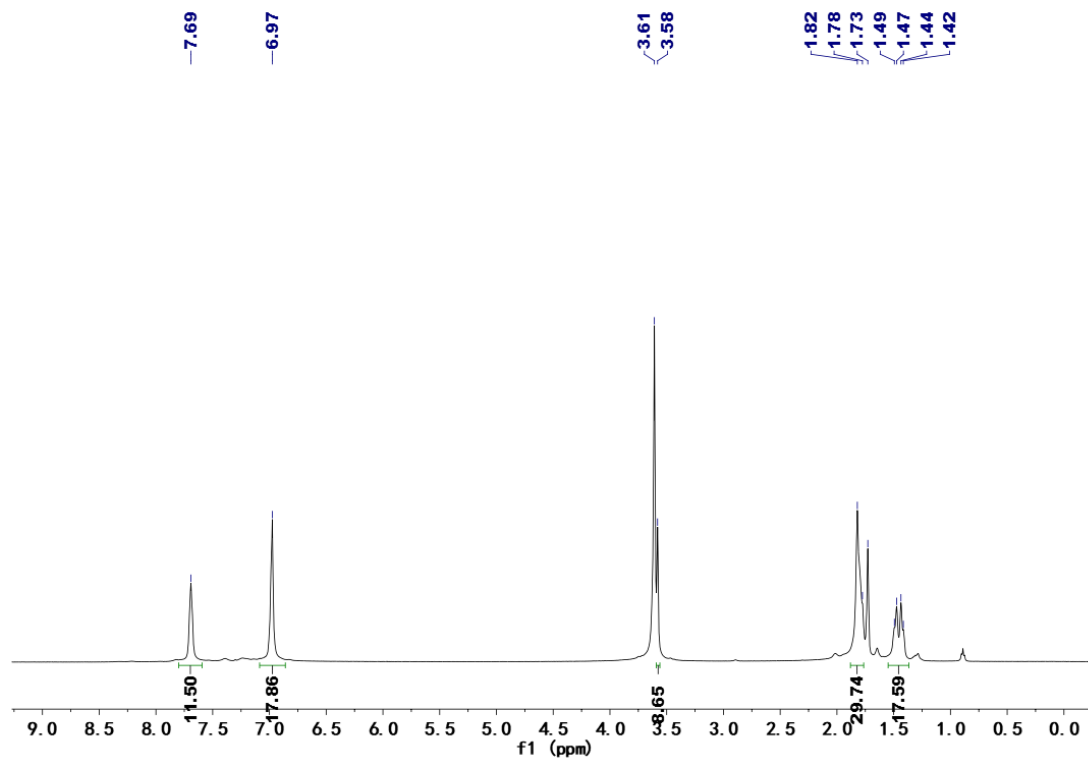

Figure S4.  $^1\text{H}$  NMR spectrum of **11** in  $\text{THF-}d_8$  at 25 °C.

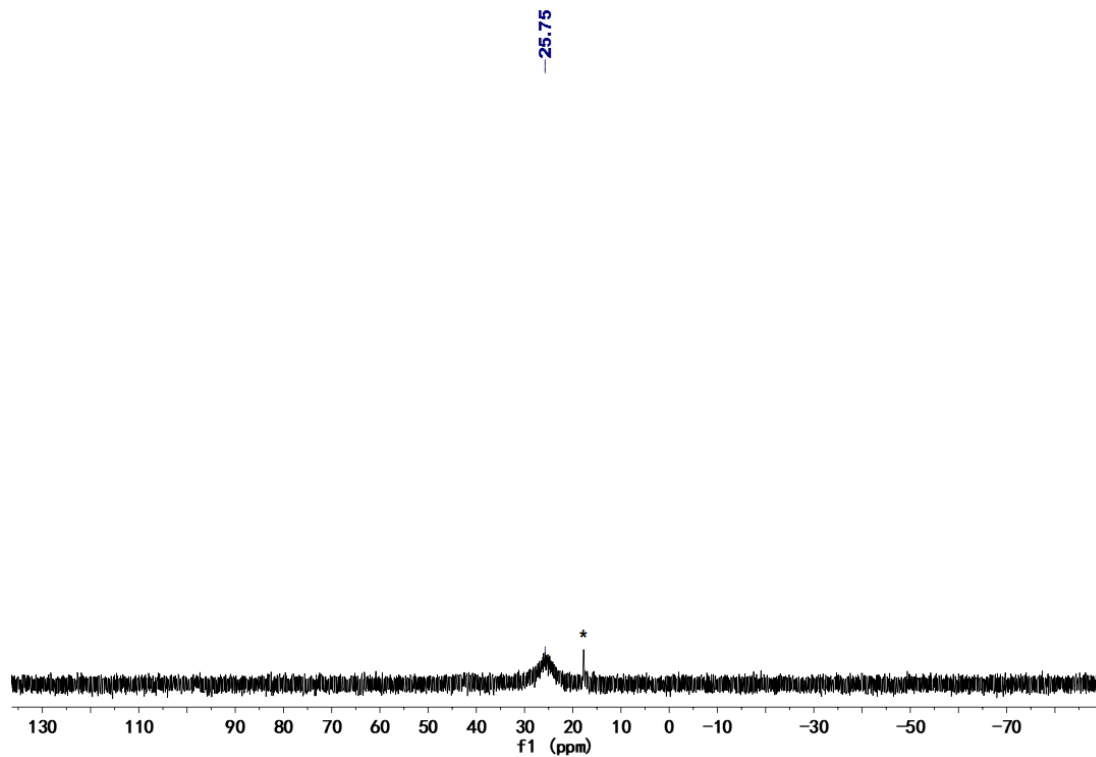

**Figure S5.**  $^{31}\text{P}\{^1\text{H}\}$  NMR spectrum of **11** in  $\text{THF-}d_8$  at  $25\text{ }^\circ\text{C}$ . (\* denotes small amount of free ligand)

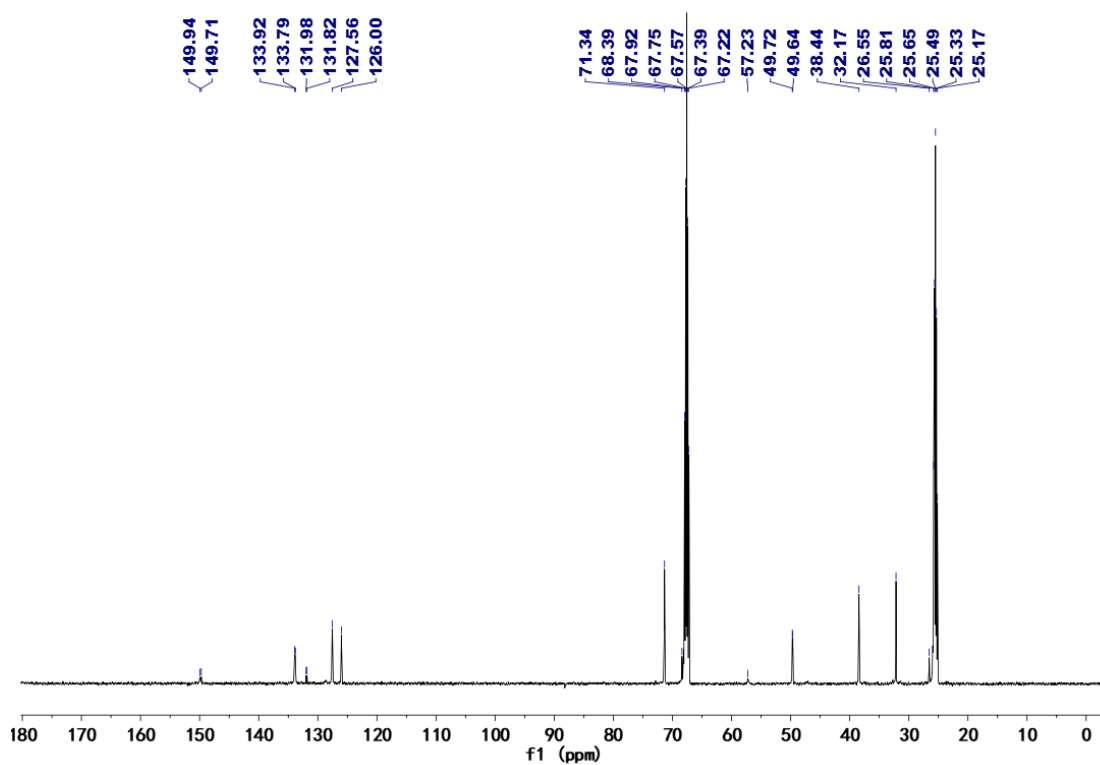

**Figure S6.**  $^{13}\text{C}\{^1\text{H}\}$  NMR spectrum of **11** in  $\text{THF-}d_8$  at  $25\text{ }^\circ\text{C}$ .

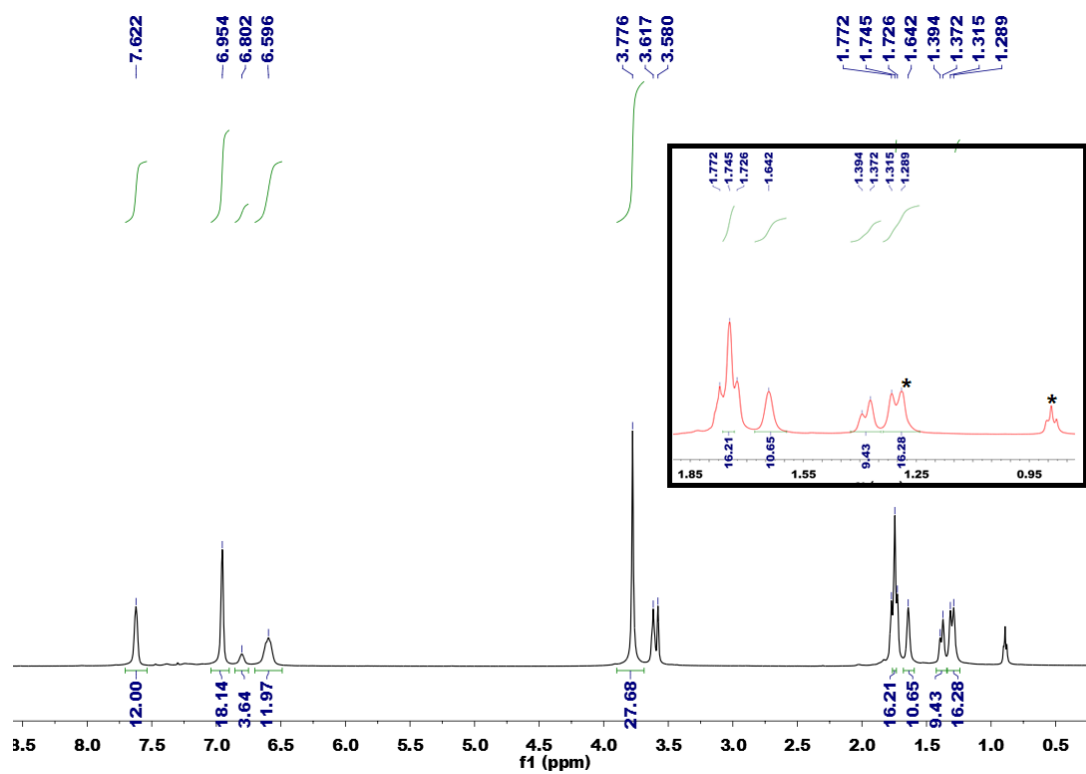

Figure S7.  $^1\text{H}$  NMR spectrum of **12** in  $\text{THF-}d_8$  at  $25\text{ }^\circ\text{C}$ . (\*denotes small amount of *n*-hexane)

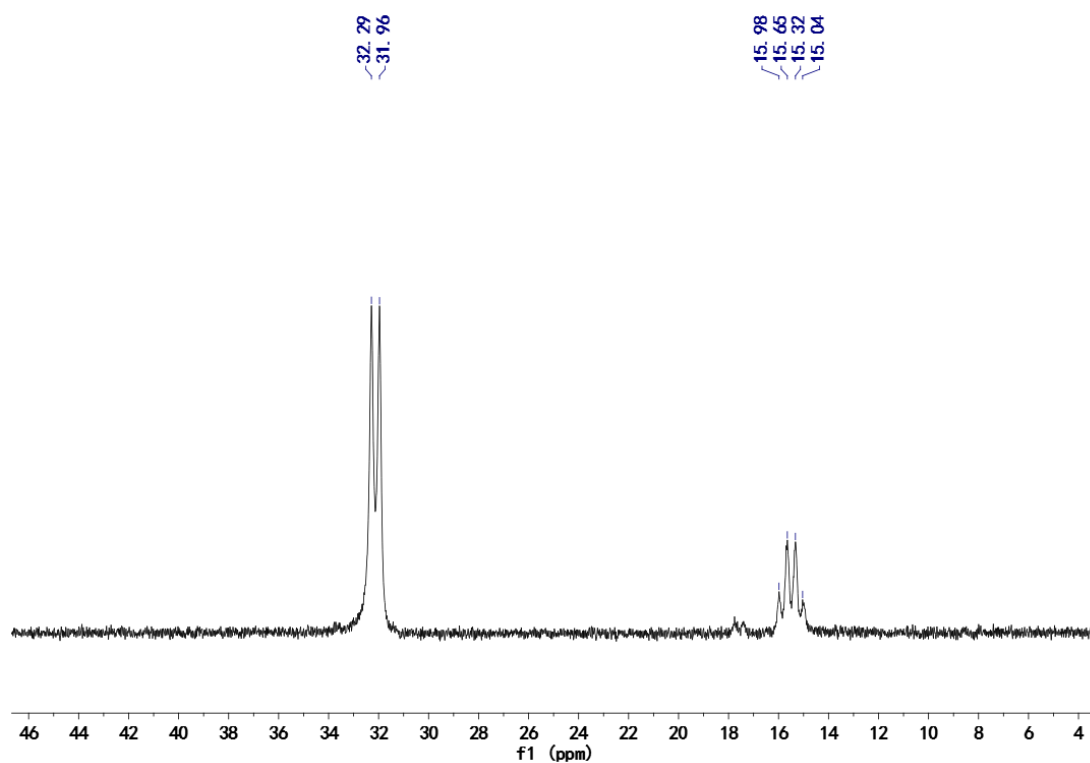

Figure S8.  $^{31}\text{P}\{^1\text{H}\}$  NMR spectrum of **12** in  $\text{THF-}d_8$  at  $25\text{ }^\circ\text{C}$ .

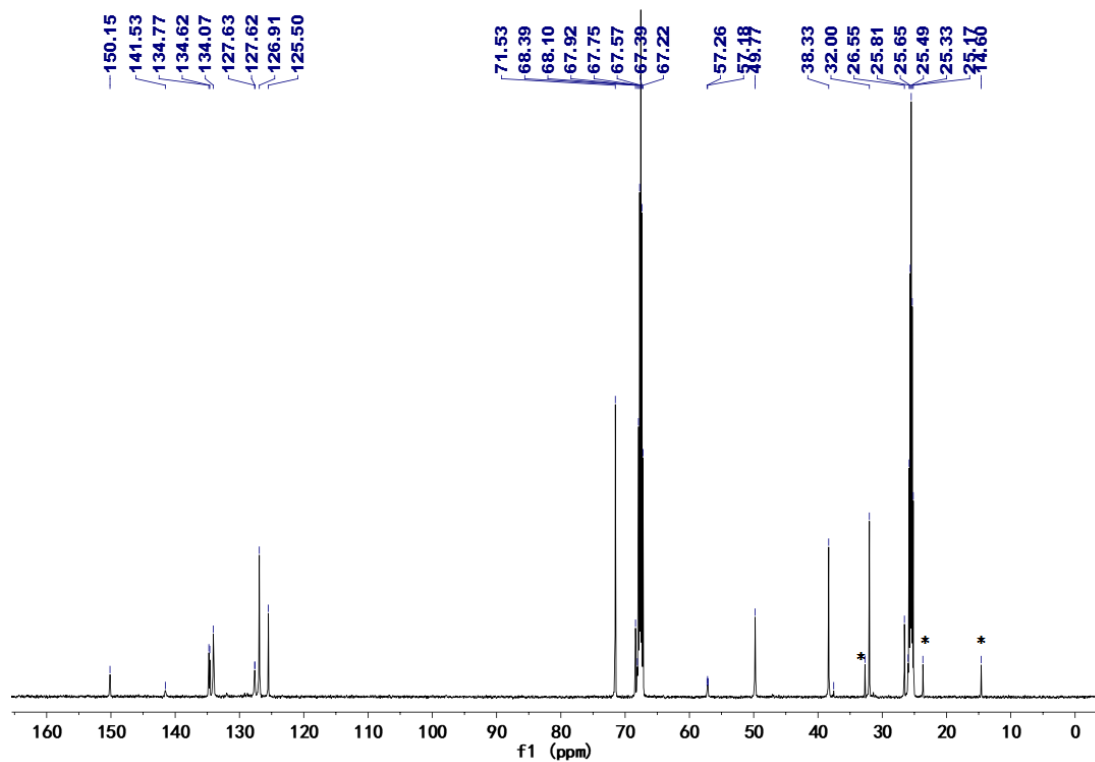

Figure S9.  $^{13}\text{C}\{^1\text{H}\}$  NMR spectrum of **12** in  $\text{THF-}d_8$  at 25 °C. (\*denotes small amount of *n*-hexane)

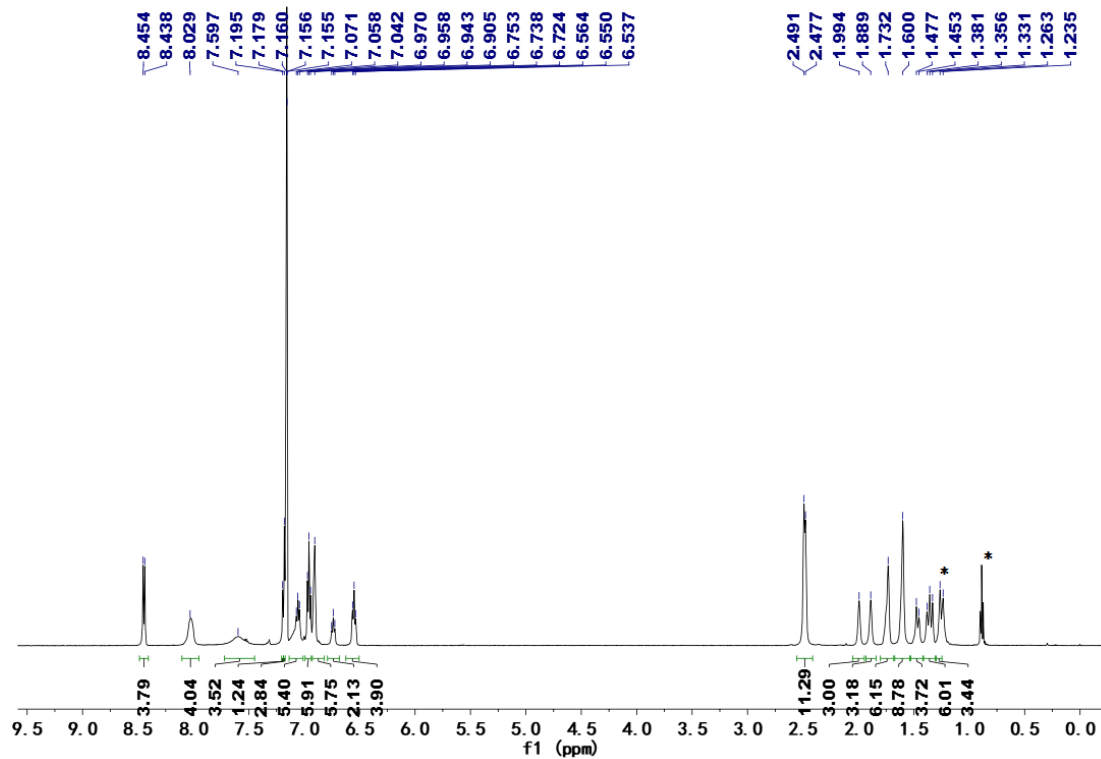

Figure S10.  $^1\text{H}$  NMR spectrum of **14** in  $\text{C}_6\text{D}_6$  at 25 °C. (\*denotes small amount of *n*-hexane)

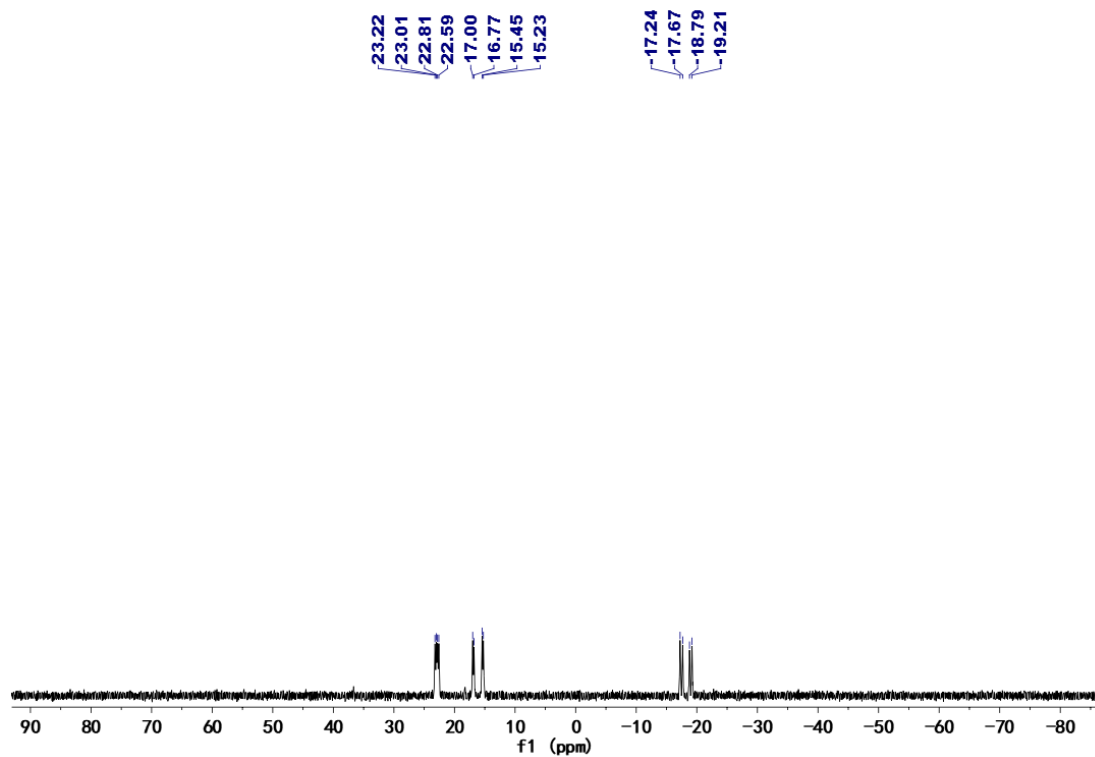

Figure S11.  $^{31}\text{P}\{^1\text{H}\}$  NMR spectrum of **14** in  $\text{C}_6\text{D}_6$  at 25 °C.

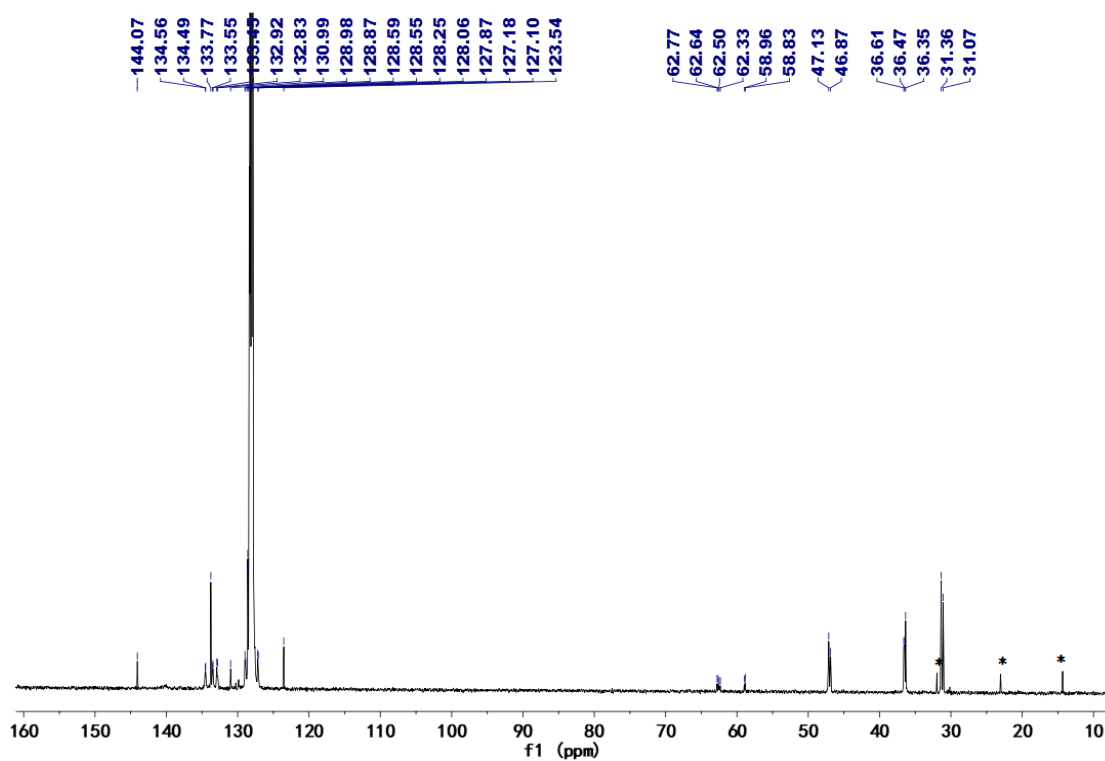

Figure S12.  $^{13}\text{C}\{^1\text{H}\}$  NMR spectrum of **14** in  $\text{C}_6\text{D}_6$  at 25 °C. (\*denotes small amount of *n*-hexane)

## 2. X-ray Crystallography

**X-ray Crystallography.** Data were collected on a Bruker CCD area-detector diffractometer with Mo K $\alpha$  radiation (graphite monochromator,  $\lambda = 0.71073 \text{ \AA}$ ) using  $\omega$  scans. The SMART program package was used for the data collection and unit cell determination; processing of the raw frame data was performed using SAINT; absorption corrections were applied with SADABS. The structures were solved by direct methods and refined against  $F^2$  using all reflections with the SHELXL-97 software as implemented in the program WinGX. Non-hydrogen atoms were refined anisotropically, and hydrogen atoms were placed in calculated positions. Crystal parameters and refinement results are given in **Table S1-S2**.

**Table S1.** Crystallographic and Refinement Data <sup>a,b</sup> for **5-9**.

|                                             | <b>5</b>                                                                                      | <b>6</b>                                                           | <b>7</b>                                                                                       | <b>8</b>                                                                                        | <b>9</b>                                                                                        |
|---------------------------------------------|-----------------------------------------------------------------------------------------------|--------------------------------------------------------------------|------------------------------------------------------------------------------------------------|-------------------------------------------------------------------------------------------------|-------------------------------------------------------------------------------------------------|
| formula                                     | C <sub>66</sub> H <sub>75</sub> GdN <sub>3</sub> P <sub>3</sub> C <sub>6</sub> H <sub>6</sub> | C <sub>66</sub> H <sub>75</sub> N <sub>3</sub> P <sub>3</sub> PdSc | C <sub>140</sub> H <sub>162</sub> N <sub>6</sub> P <sub>6</sub> Pd <sub>2</sub> Y <sub>2</sub> | C <sub>140</sub> H <sub>162</sub> N <sub>6</sub> P <sub>6</sub> Pd <sub>2</sub> Sm <sub>2</sub> | C <sub>140</sub> H <sub>162</sub> Gd <sub>3</sub> N <sub>6</sub> P <sub>6</sub> Pd <sub>2</sub> |
| Fw, g·mol <sup>-1</sup>                     | 1238.55                                                                                       | 1154.57                                                            | 2505.19                                                                                        | 2628.07                                                                                         | 2641.87                                                                                         |
| cryst size, mm                              | 0.22 x 0.21 x 0.2                                                                             | 0.22 x 0.21 x 0.2                                                  | 0.18 x 0.16 x 0.15                                                                             | 0.21 x 0.18 x 0.16                                                                              | 0.15 x 0.13 x 0.12                                                                              |
| cryst. syst.                                | Monoclinic                                                                                    | cubic                                                              | triclinic                                                                                      | triclinic                                                                                       | triclinic                                                                                       |
| space group                                 | P 1 21/n 1                                                                                    | P a -3                                                             | P -1                                                                                           | P -1                                                                                            | P -1                                                                                            |
| T, K                                        | 273.15                                                                                        | 293.15                                                             | 300.00                                                                                         | 300.00                                                                                          | 300.00                                                                                          |
| a, Å                                        | 13.570(3)                                                                                     | 23.4731(4)                                                         | 13.8280(5)                                                                                     | 13.8708(10)                                                                                     | 13.8494(7)                                                                                      |
| b, Å                                        | 38.373(8)                                                                                     | 23.4731(4)                                                         | 13.9082(6)                                                                                     | 13.9163(10)                                                                                     | 13.9163(8)                                                                                      |
| c, Å                                        | 13.783(3)                                                                                     | 23.4731(4)                                                         | 21.5268(9)                                                                                     | 21.5197(16)                                                                                     | 21.5292(12)                                                                                     |
| $\alpha$ , °                                | 90                                                                                            | 90                                                                 | 76.694(2)                                                                                      | 76.465(2)                                                                                       | 76.576(2)                                                                                       |
| $\beta$ , °                                 | 97.79(3)                                                                                      | 90                                                                 | 76.480(2)                                                                                      | 76.104(2)                                                                                       | 76.284(2)                                                                                       |
| $\gamma$ , °                                | 90                                                                                            | 90                                                                 | 61.7760(10)                                                                                    | 61.998(2)                                                                                       | 61.892(2)                                                                                       |
| V, Å <sup>3</sup>                           | 7111(3)                                                                                       | 12933.4(7)                                                         | 3512.0(3)                                                                                      | 3524.5(4)                                                                                       | 3520.3(3)                                                                                       |
| Z                                           | 4                                                                                             | 8                                                                  | 1                                                                                              | 1                                                                                               | 1                                                                                               |
| D <sub>calcd</sub> , Kg·m <sup>-3</sup>     | 1.157                                                                                         | 1.186                                                              | 1.184                                                                                          | 1.238                                                                                           | 1.246                                                                                           |
| F(000)                                      | 2572                                                                                          | 4832                                                               | 1304                                                                                           | 1350                                                                                            | 1354                                                                                            |
| $\mu$ , mm <sup>-1</sup>                    | 1.039                                                                                         | 0.496                                                              | 1.185                                                                                          | 1.186                                                                                           | 1.296                                                                                           |
| $\theta$ range /°                           | 2.901 - 27.531                                                                                | 1.503-24.995                                                       | 2.943- 27.806                                                                                  | 2.847-27.636                                                                                    | 2.941-27.544                                                                                    |
| refns collected                             | 182238                                                                                        | 90202                                                              | 257948                                                                                         | 77213                                                                                           | 87034                                                                                           |
| indep reflns ( $R_{int}$ )                  | 16291 (0.0688)                                                                                | 3813 (0.1761)                                                      | 16278 (0.0413)                                                                                 | 16114 (0.0571)                                                                                  | 16136 (0.0435)                                                                                  |
| reflns obsd [ $I > 2\sigma(I)$ ]            | 12879                                                                                         | 2155                                                               | 14002                                                                                          | 13022                                                                                           | 13858                                                                                           |
| data/restrnts/params                        | 16291 / 1674 / 700                                                                            | 3813 / 2420 / 393                                                  | 16278/1704/703                                                                                 | 16114/1698/703                                                                                  | 16136/1698/703                                                                                  |
| R1, wR2 ( $I > 2\sigma(I)$ )                | 0.0494, 0.1196                                                                                | 0.0635, 0.1594                                                     | 0.0420, 0.0979                                                                                 | 0.0610, 0.1562                                                                                  | 0.0519, 0.1160                                                                                  |
| R1, wR2 (all data)                          | 0.0652, 0.1263                                                                                | 0.1192, 0.2000                                                     | 0.0538, 0.1093                                                                                 | 0.0759, 0.1654                                                                                  | 0.0632, 0.1218                                                                                  |
| GOF on F <sup>2</sup>                       | 1.020                                                                                         | 1.056                                                              | 1.062                                                                                          | 1.039                                                                                           | 1.129                                                                                           |
| $\Delta\rho_{max, min}$ , e·Å <sup>-3</sup> | 0.688, -1.006                                                                                 | 0.485, -0.354                                                      | 1.044, -0.826                                                                                  | 1.284, -1.002                                                                                   | 1.697, -1.369                                                                                   |

$$^a R1 = \sum |F_o| - |F_c| / \sum |F_o|, \quad ^b wR2 = \{ \sum w(F_o^2 - F_c^2)^2 / \sum w(F_o^2)^2 \}^{1/2}.$$



**Table S2.** Crystallographic and Refinement Data <sup>a,b</sup> for **10**, **11**, **12**, **14** and **15**.

|                                            | <b>10</b>                                                                                                                     | <b>11</b>                                                                         | <b>12</b>                                                                                                                                 | <b>14</b>                                                                         | <b>15</b>                                                                                                             |
|--------------------------------------------|-------------------------------------------------------------------------------------------------------------------------------|-----------------------------------------------------------------------------------|-------------------------------------------------------------------------------------------------------------------------------------------|-----------------------------------------------------------------------------------|-----------------------------------------------------------------------------------------------------------------------|
| formula                                    | C <sub>140</sub> H <sub>162</sub> N <sub>6</sub> P <sub>6</sub> Pd <sub>2</sub> Yb <sub>2</sub> C <sub>6</sub> H <sub>6</sub> | C <sub>86</sub> H <sub>115</sub> KN <sub>5</sub> O <sub>8</sub> P <sub>3</sub> Yb | 2(C <sub>84</sub> H <sub>90</sub> N <sub>5</sub> P <sub>4</sub> PdYb)·4(C <sub>10</sub> H <sub>20</sub> K <sub>0.5</sub> O <sub>4</sub> ) | C <sub>78</sub> H <sub>85</sub> N <sub>3</sub> P <sub>3</sub> PdS <sub>2</sub> Sc | C <sub>78</sub> H <sub>85</sub> N <sub>3</sub> P <sub>3</sub> PdS <sub>2</sub> Yb·0.5(C <sub>7</sub> H <sub>8</sub> ) |
| Fw, g·mol <sup>-1</sup>                    | 2751.55                                                                                                                       | 1623.85                                                                           | 3985.04                                                                                                                                   | 1372.88                                                                           | 1500.96                                                                                                               |
| cryst size, mm                             | 0.22 x 0.21 x 0.20                                                                                                            | 0.12 x 0.11 x 0.1                                                                 | 0.22 x 0.21 x 0.2                                                                                                                         | 0.22 x 0.21 x 0.2                                                                 | 0.12 x 0.11 x 0.1                                                                                                     |
| cryst. syst.                               | triclinic                                                                                                                     | Monoclinic                                                                        | triclinic                                                                                                                                 | Monoclinic                                                                        | Monoclinic                                                                                                            |
| space group                                | P -1                                                                                                                          | P 1 21/c 1                                                                        | P -1                                                                                                                                      | P 1 21/c 1                                                                        | P 1 21/c 1                                                                                                            |
| T, K                                       | 300.00                                                                                                                        | 300.00                                                                            | 293.00                                                                                                                                    | 300.00                                                                            | 293.15                                                                                                                |
| a, Å                                       | 16.16(10)                                                                                                                     | 13.595(4)                                                                         | 15.94(3)                                                                                                                                  | 14.5833(14)                                                                       | 14.5010(8)                                                                                                            |
| b, Å                                       | 19.85(10)                                                                                                                     | 26.411(7)                                                                         | 25.30(5)                                                                                                                                  | 20.841(2)                                                                         | 20.8293(11)                                                                                                           |
| c, Å                                       | 23.51(11)                                                                                                                     | 26.469(7)                                                                         | 28.99(5)                                                                                                                                  | 24.931(3)                                                                         | 24.8710(14)                                                                                                           |
| α, °                                       | 102.38(8)                                                                                                                     | 90                                                                                | 95.28(8)                                                                                                                                  | 90                                                                                | 90                                                                                                                    |
| β, °                                       | 97.83(8)                                                                                                                      | 100.664(4)                                                                        | 105.02(11)                                                                                                                                | 94.704(4)                                                                         | 95.3790(10)                                                                                                           |
| γ, °                                       | 90.57(19)                                                                                                                     | 90                                                                                | 91.01(9)                                                                                                                                  | 90                                                                                | 90                                                                                                                    |
| V, Å <sup>3</sup>                          | 7288(67)                                                                                                                      | 9340(4)                                                                           | 11233(34)                                                                                                                                 | 7551.8(14)                                                                        | 7479.1(7)                                                                                                             |
| Z                                          | 2                                                                                                                             | 4                                                                                 | 2                                                                                                                                         | 4                                                                                 | 4                                                                                                                     |
| D <sub>calc</sub> , Kg·m <sup>-3</sup>     | 1.254                                                                                                                         | 1.155                                                                             | 1.178                                                                                                                                     | 1.208                                                                             | 1.333                                                                                                                 |
| F(000)                                     | 2816                                                                                                                          | 3400                                                                              | 4136                                                                                                                                      | 2872                                                                              | 3068                                                                                                                  |
| μ, mm <sup>-1</sup>                        | 1.627                                                                                                                         | 1.146                                                                             | 1.130                                                                                                                                     | 0.489                                                                             | 1.645                                                                                                                 |
| θ range /°                                 | 2.795-27.318                                                                                                                  | 1.524-25.000                                                                      | 2.844-28.681                                                                                                                              | 2.845-27.567                                                                      | 1.410-27.488                                                                                                          |
| refns collected                            | 144945                                                                                                                        | 64432                                                                             | 259815                                                                                                                                    | 167852                                                                            | 65130                                                                                                                 |
| indep reflns (R <sub>int</sub> )           | 32258 (0.0836)                                                                                                                | 16409(0.0963)                                                                     | 55260(0.0772)                                                                                                                             | 17369(0.1044)                                                                     | 17061(0.0670)                                                                                                         |
| reflns obsd [I > 2σ(I)]                    | 19922                                                                                                                         | 11113                                                                             | 32754                                                                                                                                     | 12607                                                                             | 11277                                                                                                                 |
| data/restrnts/params                       | 32258/3487/1435                                                                                                               | 16409 /917/1104                                                                   | 55260/8291/2424                                                                                                                           | 17369/1854/793                                                                    | 17061/793/0                                                                                                           |
| R1, wR2 (I > 2σ(I))                        | 0.0973, 0.2588                                                                                                                | 0.1104, 0.2723                                                                    | 0.0723, 0.1715                                                                                                                            | 0.0749, 0.1842                                                                    | 0.0385, 0.0708                                                                                                        |
| R1, wR2 (all data)                         | 0.1450, 0.3018                                                                                                                | 0.1499, 0.2993                                                                    | 0.1337, 0.2151                                                                                                                            | 0.1027, 0.2043                                                                    | 0.0776, 0.0811                                                                                                        |
| GOF on F <sup>2</sup>                      | 1.040                                                                                                                         | 1.177                                                                             | 1.021                                                                                                                                     | 1.034                                                                             | 1.016                                                                                                                 |
| Δρ <sub>max, min</sub> , e·Å <sup>-3</sup> | 8.687, -2.462                                                                                                                 | 3.378, -1.744                                                                     | 3.626, -1.842                                                                                                                             | 0.921, -0.646                                                                     | 1.002, -1.034                                                                                                         |

$$^a R1 = \sum |F_o| - |F_c| / \sum |F_o|, \quad ^b wR2 = \{ \sum w(F_o^2 - F_c^2)^2 / \sum w(F_o^2)^2 \}^{1/2}.$$

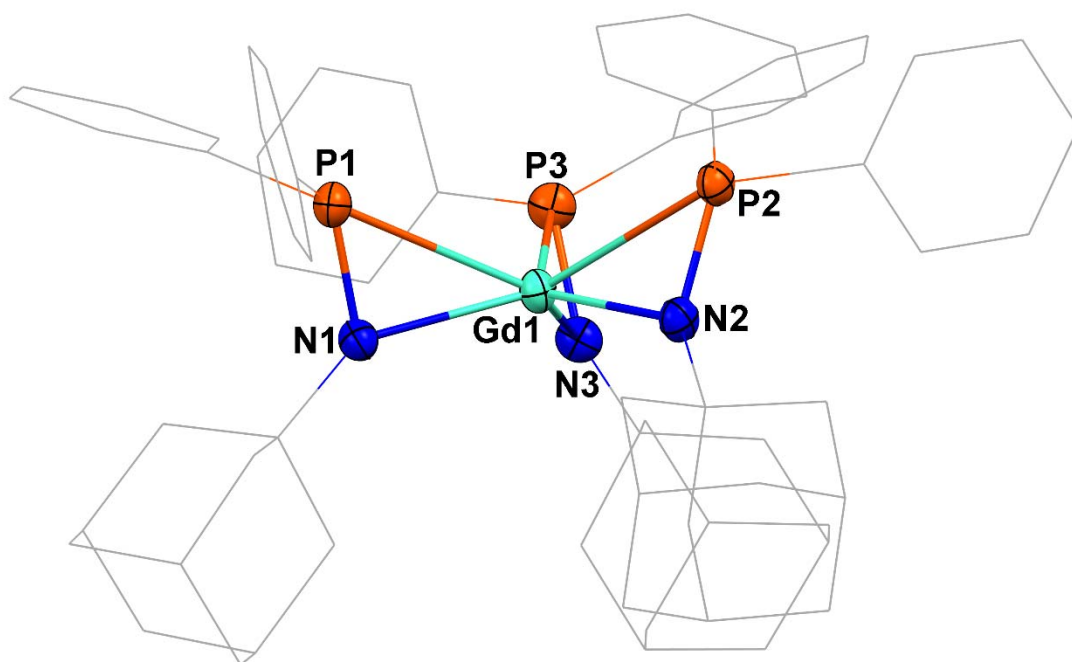

**Fig. S13.** Molecular structure of **5**. Hydrogen atoms and co-crystallized solvent molecule was omitted for clarity.

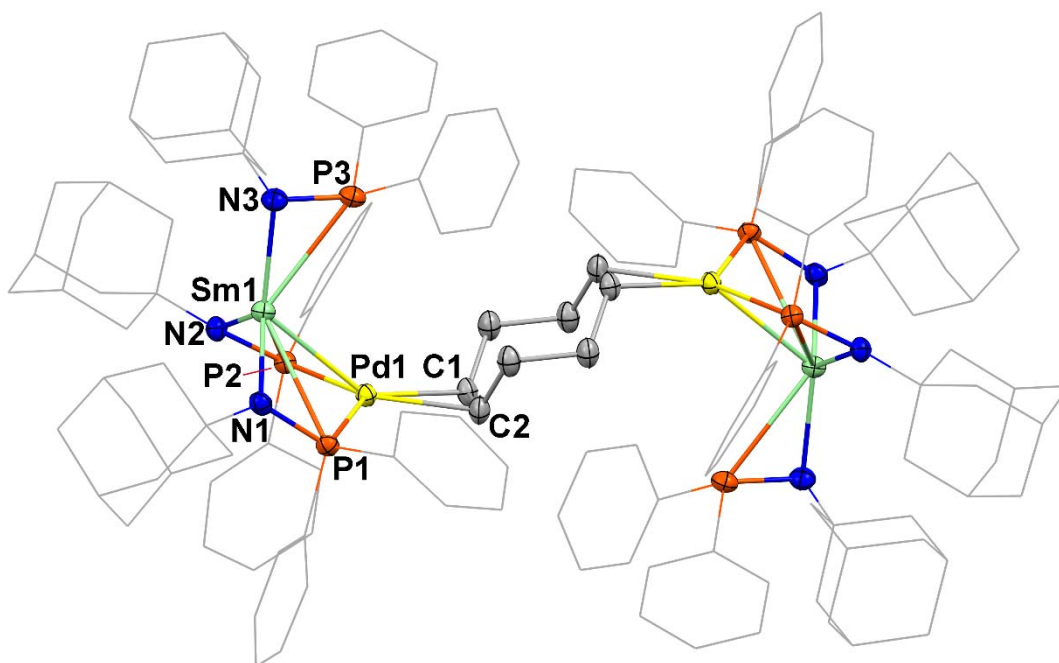

**Fig. S14.** Molecular structure of **8**. Hydrogen atoms were omitted for clarity.

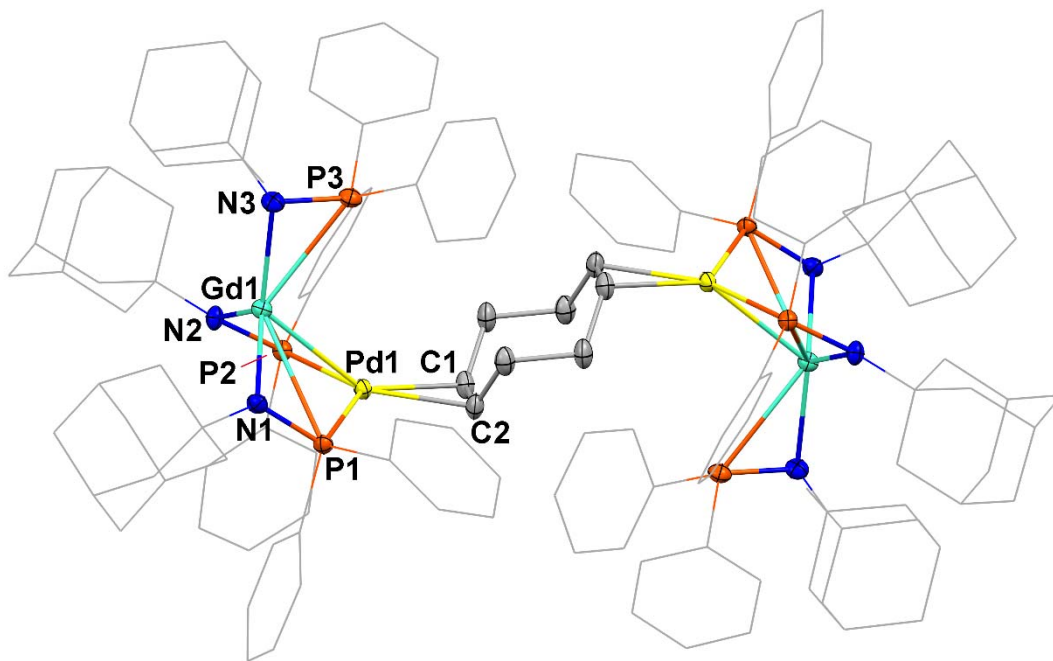

**Fig. S15.** Molecular structure of **9**. Hydrogen atoms were omitted for clarity.

### 3. Computational Results

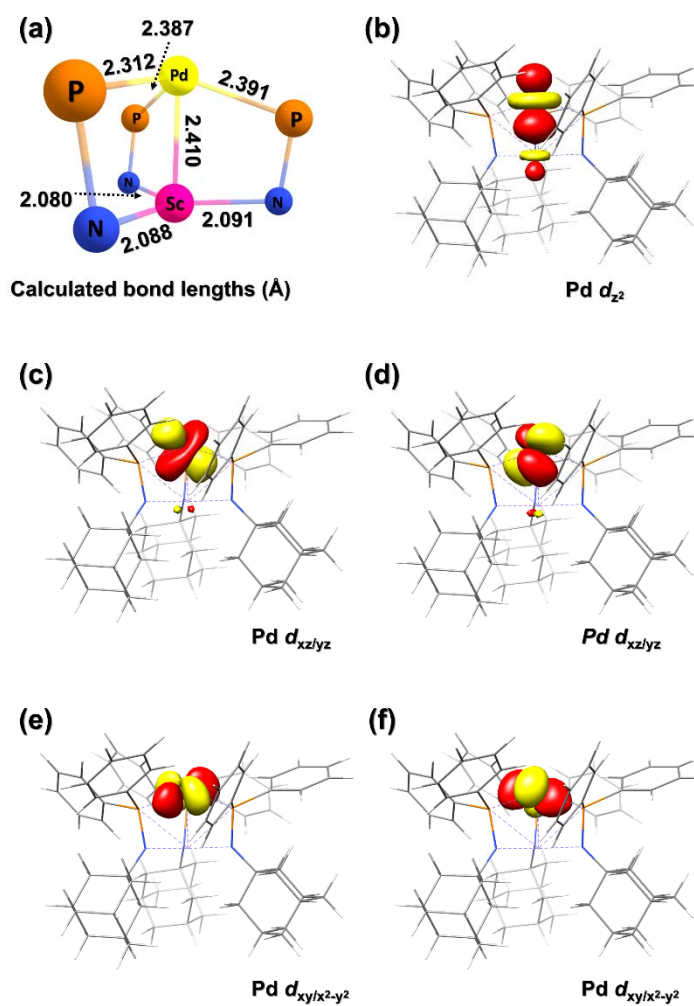

**Fig. S16.** Calculated bond lengths in the primary coordination sphere in **6** (a) and the localized  $d$  orbitals of Pd(0) centre (b-f).
